# Supplementary material for: Thermoelectric properties and high-temperature stability of the Ti1−xVxCoSb1−xSnx half-Heusler alloys
Source: Royal Society of Chemistry journal article supplement (doi:10.1039/c6ra09549f), 2016-01-01
Supplement: c6ra09549f1.pdf [file c6ra09549f1.pdf]

Supplementary information for:

**Thermoelectric properties and high-temperature stability of the  $\text{Ti}_{1-x}\text{V}_x\text{CoSb}_{1-x}\text{Sn}_x$  half-Heusler alloys**

M. Asaad,<sup>a</sup> J. Buckman,<sup>b</sup> R. I. Smith<sup>c</sup> and J.W.G. Bos<sup>a,\*</sup>

<sup>a</sup> *Institute of Chemical Sciences and Centre for Advanced Energy Storage and Recovery, School of Engineering and Physical Sciences, Heriot-Watt University, Edinburgh, EH14 4AS, UK.*

<sup>b</sup> *Institute of Petroleum Engineering, School of Energy, Geoscience, Infrastructure and Society, Heriot-Watt University, Edinburgh, EH14 4AS, UK*

<sup>c</sup> *ISIS Facility, Rutherford Appleton Laboratory, Harwell Oxford, Didcot, OX11 0QX, UK*

[j.w.g.bos@hw.ac.uk](mailto:j.w.g.bos@hw.ac.uk)

Table S1. Lattice parameters, densities and percentage densities for the preliminary cold-pressed  $\text{Ti}_{1-x}\text{V}_x\text{CoSb}_{1-x}\text{Sn}_x$  series. No solid pellets were obtained for the  $x = 0.125$  and  $x \geq 0.625$  compositions.

| x     | $a_{\text{HH}}$ (Å) | Density (g cm <sup>-3</sup> ) | Density (%) |
|-------|---------------------|-------------------------------|-------------|
| 0     | 5.8825(1)           | 5.22                          | 69.9        |
| 0.125 | 5.8779(1)           | -                             | -           |
| 0.25  | 5.8743(1)           | 5.30                          | 70.7        |
| 0.375 | 5.8692(1)           | 5.46                          | 72.6        |
| 0.5   | 5.8680(3)           | 5.65                          | 75.2        |
| 0.625 | 5.8672(3)           | -                             | -           |
| 0.75  | 5.8691(2)           | -                             | -           |
| 1     | -                   | -                             | -           |

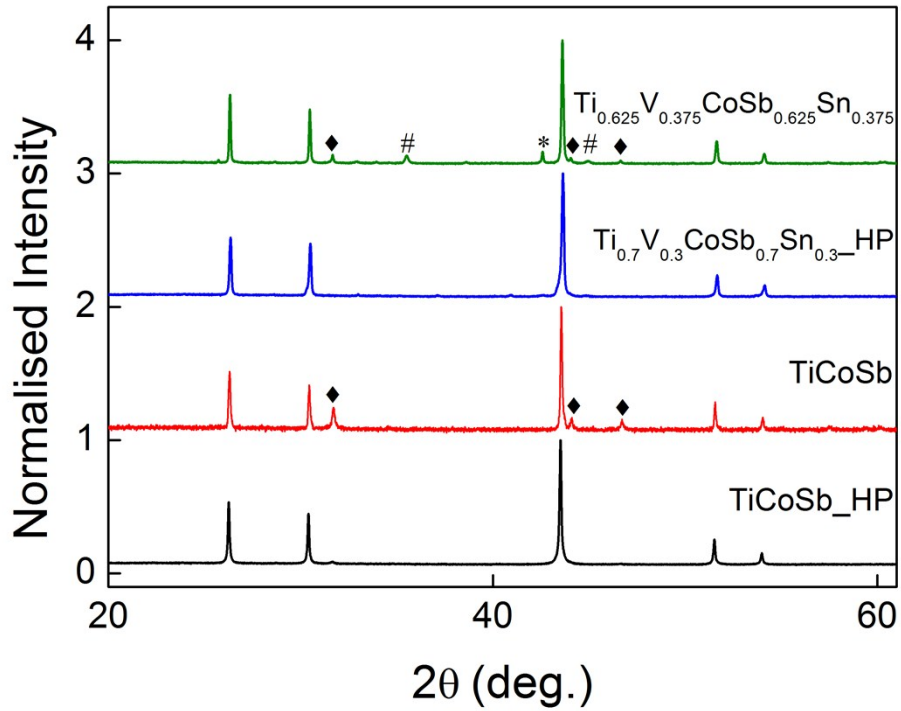

Figure S1. X-ray powder diffraction patterns for hot- and cold-pressed  $\text{TiCoSb}$ , hot-pressed  $\text{Ti}_{0.7}\text{V}_{0.3}\text{CoSb}_{0.7}\text{Sn}_{0.3}$  and cold-pressed  $\text{Ti}_{0.625}\text{V}_{0.375}\text{CoSb}_{0.625}\text{Sn}_{0.375}$  after repeat thermoelectric property measurements. Diffraction patterns of the cold- and hot-pressed samples before measurement can be found in Fig. 1 and Fig. 3 of the manuscript, respectively. (Data have been normalised and offset by 1; ♦:  $\text{CoSb}$ , \*:  $\text{VCo}_2\text{Sn}$ , #:  $\text{CoSn}_2$ ).

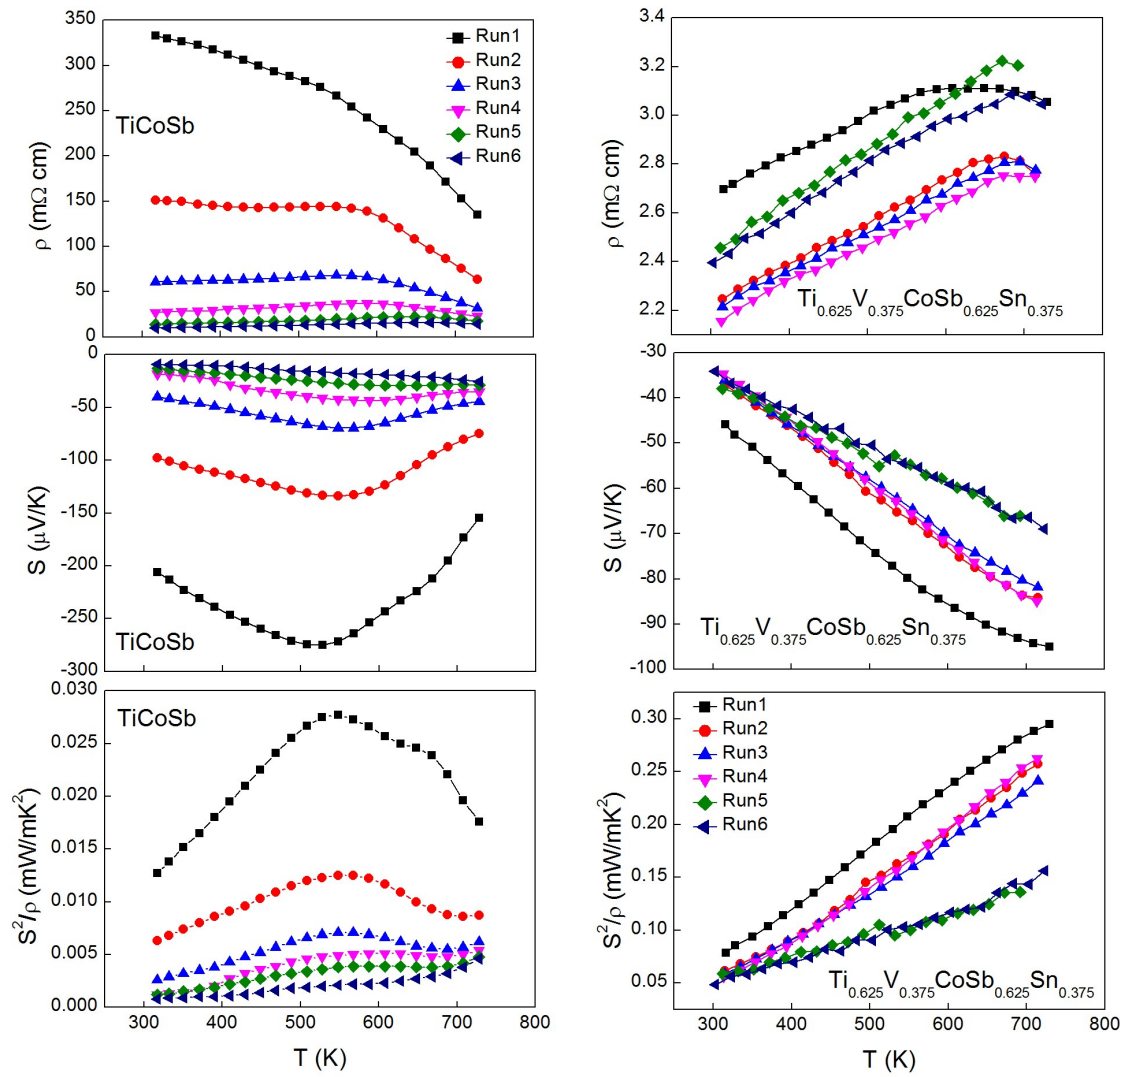

Figure S2. Repeatability tests of the electrical resistivity ( $\rho$ ), Seebeck coefficient ( $S$ ), and thermoelectric power factor ( $S^2/\rho$ ) for cold-pressed TiCoSb and  $\text{Ti}_{0.625}\text{V}_{0.375}\text{CoSb}_{0.625}\text{Sn}_{0.375}$ . Run 1-6 are consecutive measurements on the same TiCoSb or  $\text{Ti}_{0.625}\text{V}_{0.375}\text{CoSb}_{0.625}\text{Sn}_{0.375}$  sample. The samples were taken out of the instrument between individual measurements.
